# Supplementary material for: X-linked muscular dystrophy in a Labrador Retriever strain: phenotypic and molecular characterisation
Source: PubMed Central journal article supplement (PMC7412789; doi:10.1186/s13395-020-00239-0), 2020-08-07
Supplement: 13395_2020_239_MOESM6_ESM.pdf [file 13395_2020_239_MOESM6_ESM.pdf]

Table S1 : sequences of PCR primers.

| Use                                                                                     | Name of the primer   | Sequence (5'-3')        |
|-----------------------------------------------------------------------------------------|----------------------|-------------------------|
| Screening of the dystrophin cDNA by nested RT-PCRs<br><br>(Ref seq: ENSCAFT00000036277) | Ex3Fo                | GGAAGCAGCACATAGAGAGAAC  |
|                                                                                         | Ex3Fi                | GAGACGCCTCCTAGACCTT     |
|                                                                                         | Ex10Ro               | TCACTTCTTCGACATCATTAG   |
|                                                                                         | Ex10Ri               | CTTCCAAAGCTGTTTGATAAC   |
|                                                                                         | Ex10Fo               | GTTATCAAACAGCTTTGGAAG   |
|                                                                                         | Ex10Fi               | CTAATGATGTCTGAAGAAGTGA  |
|                                                                                         | Ex15Fo               | TTTCGGAGAAGGAAGATGCA    |
|                                                                                         | Ex15Fi               | GGCTTTAAGGATCAAAGTGA    |
|                                                                                         | Ex20Ro               | GATGATGTTGTTCTGATACTC   |
|                                                                                         | Ex20Ri               | CTTAGCAATTGGCAGAACTC    |
|                                                                                         | Ex22Ro               | CTCTGTTCCATGATGTCATATTC |
|                                                                                         | Ex22Ri               | TGTCAGGATGGTACTCATAG    |
|                                                                                         | Ex21Fo               | CCTGAAAGAGAAAGGACAAG    |
|                                                                                         | Ex21Fi               | CTTTGTGGCCTTTACAAATC    |
|                                                                                         | Ex26Ro               | TCAACTGCTGTCTGTAATTC    |
|                                                                                         | Ex26Ri               | TCTCAGCTTGTGTCATCCA     |
|                                                                                         | Ex25Fo               | TAGTCTCAACAGTGTCAATG    |
|                                                                                         | Ex25Fi               | CAGAAGATGAAGAATGAAGC    |
|                                                                                         | Ex36Ro               | CCAGTTACTATTCAGAAGAC    |
|                                                                                         | Ex36Ri               | CCACCAACATTTCTTCTTG     |
|                                                                                         | Ex35Fo               | GCTTGAAATTGTCCCCTAAG    |
|                                                                                         | Ex35Fi               | CAGATATGGAAGTACAAAG     |
|                                                                                         | Ex46Ro               | GCATCTGTTTTGAGGACTG     |
|                                                                                         | Ex46Ri               | GTTGCATTCAATACCCTGAC    |
|                                                                                         | Ex45Fo               | CAGAAGCTGAACAGTTTCTC    |
|                                                                                         | Ex45Fi               | CACAAATTCCTGAGAATTGG    |
|                                                                                         | Ex56Ro               | CTAGAAGCCTTTCCTTATGG    |
|                                                                                         | Ex56Ri               | GTTGTTTCGGCTTCTGTAAG    |
|                                                                                         | Ex55Fo               | GTGGCAGATAAATGTAGATG    |
|                                                                                         | Ex55Fi               | CTTCTCCGAGATTTATTCTGC   |
|                                                                                         | Ex67Ro               | GTAAGTGTCTTCCAAATGGG    |
|                                                                                         | Ex67Ri               | GTTTTAAAAGACAGGACCCG    |
|                                                                                         | Ex66Fo               | CAACCTCAAGCAAATGACC     |
| Ex66Fi                                                                                  | CTGTCTGACCACTATTTATG |                         |
| Ex79Ro                                                                                  | CTGAAACTAAGGACTCCATC |                         |
| Ex79Ri                                                                                  | GGAAAAGGCTTCTACATTG  |                         |
| Screening of the intron 20 by PCR<br>(Ref seq: ENSCAFG00000023562)                      | F1 (in Exon 20)      | AAACTGGTTGAAAACCCAGC    |
|                                                                                         | R1                   | TTATCACCCCTCTACCACCA    |
|                                                                                         | F2                   | TGTCAAGGAACACGAGA       |
|                                                                                         | R2                   | AGAAAAAGAGTAAGGGGTCAT   |
|                                                                                         | F3                   | GAGGGGTTGAGATAAGATGA    |
|                                                                                         | R3                   | GGAGGGGAAAATGGAAAGAA    |
|                                                                                         | F4                   | ACAAGTGACAGTGCCCGTTA    |
|                                                                                         | R4 (in Exon 21)      | GCCCTTGTCTTTCTCTTTT     |
| Screening of the intron 20 by PCR<br>(delineation of the mutation site)                 | F4i                  | GAGCAAACCTCACTCTAAC     |
|                                                                                         | R4i                  | CACATTACTTCTCCTGACTG    |
| Distant breakpoint characterization<br>by PCR<br>(Ref seq: Ensembl CanFam3.1)           | MutF                 | CAGATGTTAGGCCTTGTTA     |
|                                                                                         | MutR                 | GCATGAATGATGATTGCAATG   |
| Dp71 RT-PCR<br>(Ref seq: AY566609)                                                      | Dp71F                | CAGCTCAAAGGCCACGAGAC    |
|                                                                                         | Ex64-65R             | AGGCTCAAGAGATCCAAGCA    |
