# Supplementary material for: X-linked muscular dystrophy in a Labrador Retriever strain: phenotypic and molecular characterisation
Source: PubMed Central journal article supplement (PMC7412789; doi:10.1186/s13395-020-00239-0), 2020-08-07
Supplement: 13395_2020_239_MOESM7_ESM.pdf [file 13395_2020_239_MOESM7_ESM.pdf]

**Dogs with clinical, histopathological, immunohistochemical suspicion of DMD without mutation characterization**

| Breed                        | Clinical description | Histopathological description | Dystrophin absence IHC and/or WB | Specific observations                | Reference |
|------------------------------|----------------------|-------------------------------|----------------------------------|--------------------------------------|-----------|
| Irish terrier                | x                    | x                             |                                  |                                      | [9]       |
| WH Fox terrier               | x                    | x                             | x                                |                                      | [11]      |
| Miniature schnauzer          | x                    | x                             | x                                |                                      | [12]      |
| Samoyed                      | x                    | x                             |                                  |                                      | [13]      |
| Gronendael                   | x                    | x                             |                                  |                                      | [14]      |
| Brittany spaniel             | x                    | x                             |                                  |                                      | [16]      |
| Rat terrier                  | x                    | x                             | x                                |                                      | [18]      |
| Labrador retriever           | x                    | x                             | x                                |                                      | [19]      |
| Old english shepherd dog     | x                    | x                             | x                                |                                      | [20]      |
| Weimaraner                   | x                    | x                             | x                                |                                      | [21]      |
| Grand basset griffon vendéen | x                    | x                             | x                                |                                      | [22]      |
| Alaskan Malamute             | x                    | x                             | x                                |                                      | [25]      |
| Labrador retriever           | x                    | x                             | x                                | BMD-like IHC, WB: 135 kDa dystrophin | [26]      |
| Labrador retriever           | x                    | x                             | x                                | Very mild phenotype                  | [27]      |
| Lurcher                      | x                    | x                             | x                                |                                      | [29]      |
| Border Terrier               | x                    | x                             | x                                | BMD-like                             | [35]      |

**Dogs with confirmed and characterized DMD mutations**

| Breed                         | Mutation type              | Location                     | Colony availability (to our knowledge) | phenotypic/functional description | Specific observations                                             | Reference     |
|-------------------------------|----------------------------|------------------------------|----------------------------------------|-----------------------------------|-------------------------------------------------------------------|---------------|
| Golden retriever 'GRMD'       | Splice site point mutation | Intron 6                     | x                                      | x                                 | reference canine preclinical model for DMD                        | [5] [38]      |
| Rottweiler                    | Non-sense mutation         | Exon 58                      |                                        |                                   |                                                                   | [15]          |
| German short-haired pointer   | 5.6 Mb deletion            | Whole DMD gene + TMEM47 gene | x                                      |                                   | no revertant fibers, potential interest immunological/ cognition? | [17] [36]     |
| Welsh Corgi                   | Insertion (LINE-1 element) | Intron 13                    | x                                      |                                   |                                                                   | [23]          |
| Cavalier King Charles spaniel | Splice site mutation       | Intron 50                    | x                                      | ongoing                           | amenable to exon 51 skipping                                      | [24]          |
| Labrador retriever            | 184 bp insertion           | Intron 19                    |                                        |                                   |                                                                   | [6] [37]      |
| Cocker spaniel                | 4 bp deletion              | Exon 65                      |                                        |                                   |                                                                   | [6]           |
| Tibetan terrier               | Deletion                   | Exons 8 to 29                |                                        |                                   |                                                                   | [6]           |
| Norfolk terrier               | 1 bp deletion              | Exon 22                      |                                        |                                   |                                                                   | [28]          |
| Japanese spitz                | 5.4 Mb inversion           | Intron 19 -RPGR gene         |                                        |                                   | Dp71 expression in skeletal muscles                               | [30]          |
| Cavalier King Charles spaniel | 7 bp deletion              | Exon 42                      |                                        |                                   |                                                                   | [31]          |
| Miniature Poodle              | > 5Mb deletion             | Whole DMD gene               |                                        |                                   |                                                                   | [32]          |
| Border Collie                 | 1 bp deletion              | Exon 20                      | semen archived                         |                                   |                                                                   | [33]          |
| Labradoodle                   | Point mutation             | Exon 21                      | x                                      | x                                 |                                                                   | [34]          |
| Labrador retriever            | 2.2 Mb inversion           | Intron 20                    | x                                      | x                                 | Dp71 expression in skeletal muscles                               | present study |
